# Supplementary material for: Comparison of self-report and objective measures of male sexual dysfunction in a Japanese primary care setting: a cross-sectional, self-administered mixed methods survey
Source: HighWire-hosted journal article supplement (doi:10.1136/fmch-2020-000403), 2021-01-01
Supplement: fmch-2020-000403supp001_data_supplement.pdf [file fmch-2020-000403supp001_data_supplement.pdf]

## Appendix 1. The questionnaire

### Section A

Please answer the following questions.

Q1. Do you have any sexual dysfunction?

1. Yes
2. No

Q2. Do you desire sexual dysfunction treatment?

1. Yes
2. No

Q3. Why do/don't you desire treatment? [Please write down below]

Q4. Do you want to receive treatment from primary care physicians?

1. Yes
2. No → Jump to Section B

Q5. Have you ever talked about your sexual dysfunction to your primary care physician?

1. Yes → Jump to Section B
2. No

Q6. Why have you hesitated to talk about sexual dysfunction with primary care physicians? [Multiple choice]

1. I felt ashamed to talk about sexual dysfunction
2. I felt primary care physicians would dismiss complaints about sexual dysfunction
3. I felt primary care physicians would be uncomfortable to talk about sexual dysfunction
4. I thought there was no treatment for sexual dysfunction
5. I did not know primary care physicians can treat sexual dysfunction
6. I hesitated because my primary care physician was a female
7. Other reason [Please write down: ]

## Section B

Please circle the response that best describes your situation for the following five questions:

| Over the Past 6 months:                                                                                                 |                                  |                            |                                                 |                                     |                                                |                              |
|-------------------------------------------------------------------------------------------------------------------------|----------------------------------|----------------------------|-------------------------------------------------|-------------------------------------|------------------------------------------------|------------------------------|
| Q7. How do you rate your confidence that you could get and keep an erection?                                            |                                  | Very low<br>1              | Low<br>2                                        | Moderate<br>3                       | High<br>4                                      | Very high<br>5               |
| Q8. When you had erections with sexual stimulation, how often were your erections hard enough for penetration?          | No sexual activity<br>0          | Almost never or never<br>1 | A few times (much less than half the time)<br>2 | Sometimes (about half at time)<br>3 | Most times (much more than half the time)<br>4 | Almost always or always<br>5 |
| Q9. During sexual intercourse, how often were you able to maintain your erection after you had penetrated your partner? | Did not attempt intercourse<br>0 | Almost never or never<br>1 | A few times (much less than half the time)<br>2 | Sometimes (about half at time)<br>3 | Most times (much more than half the time)<br>4 | Almost always or always<br>5 |
| Q10. During sexual intercourse, how difficult was it to maintain your erection to completion of intercourse?            | Did not attempt intercourse<br>0 | Extremely difficult<br>1   | Very difficult<br>2                             | Difficult<br>3                      | Slightly difficult<br>4                        | Not difficult<br>5           |
| Q11. When you attempted sexual intercourse, how often was it satisfactory for you?                                      | Did not attempt intercourse<br>0 | Almost never or never<br>1 | A few times (much less than half the time)<br>2 | Sometimes (about half at time)<br>3 | Most times (much more than half the time)<br>4 | Almost always or always<br>5 |

Abbreviation: PCPs, Primary care providers. IIEF-5, five-item version of the International Index of Erectile Function.
